# Supplementary material for: Day and night heat stress trigger different transcriptomic responses in green and ripening grapevine (vitis vinifera) fruit
Source: PubMed Central journal article supplement (PMC4030582; doi:10.1186/1471-2229-14-108), 2014-04-28
Supplement: 1471-2229-14-108-S5.pdf [file 1471-2229-14-108-S5.pdf]

| CLUSTER                              |                                | 1                         | 2                         | 3  | 4   | 5    | 6   | 7   | 8   |
|--------------------------------------|--------------------------------|---------------------------|---------------------------|----|-----|------|-----|-----|-----|
| <b>Transport Overview</b>            | Gaseous transport              | 46                        |                           |    |     |      |     |     |     |
|                                      | channels and pores             | oxygen transport          | 46                        |    |     |      |     |     |     |
|                                      |                                | a-type channels           |                           | 20 |     |      |     |     |     |
|                                      | Incompl. charact. transp.syst. | annexin                   | Cat. channel-form, HSP-70 |    |     | 12   |     |     |     |
|                                      |                                |                           | Iron / lead transp.       |    |     |      |     |     | 3   |
|                                      |                                | unkwon bioch. Reactions   |                           |    |     |      |     |     | 3   |
|                                      | Mitoch. Mem. transp.           | Oxidase-dep Fe2+ tr       |                           |    |     |      |     |     | 5   |
|                                      |                                |                           |                           |    |     |      |     |     | 5   |
|                                      |                                |                           |                           | 15 |     |      |     |     |     |
| <b>Signaling</b>                     | hormone signaling              |                           |                           |    |     |      |     | 1.5 |     |
|                                      | ethylene signaling             |                           |                           |    |     |      |     | 1.5 |     |
|                                      |                                | ethylene-med. sign.       |                           |    |     |      |     |     | 2.4 |
|                                      | signaling pathway              | protein kinase            |                           |    |     |      |     | 2.5 |     |
| <b>Response to stimulus</b>          | Stress response                | Abiotic stress            |                           |    |     |      |     | 1.6 |     |
|                                      |                                |                           |                           |    |     |      |     | 2.2 |     |
|                                      |                                | Oxidative stress response |                           |    |     |      |     | 2.5 |     |
|                                      |                                | Temp. stress response     |                           |    | 7.1 |      |     |     |     |
|                                      | wounding                       |                           |                           |    |     |      |     | 9.8 |     |
| <b>Regulation of gene expression</b> |                                |                           |                           |    |     |      |     | 1.4 |     |
|                                      | Regulation of transcription    |                           |                           |    |     |      |     | 1.4 |     |
|                                      | Transcription factor           |                           |                           |    |     |      |     | 1.4 |     |
|                                      |                                | Co-like/B-box family      |                           |    |     | 16.4 |     |     |     |
|                                      |                                | AP2 family                |                           |    |     |      | 5.7 |     |     |
|                                      |                                | ERF subfamily             |                           |    |     |      | 1.5 |     |     |
